# Supplementary figures and images for: SRSF2 directly inhibits intron splicing to suppresses cassette exon inclusion
Source: PubMed Central journal article supplement — BMB Rep. 2017 Aug 31;50(8):423–8. doi: 10.5483/BMBRep.2017.50.8.103 (PMC5595172; doi:10.5483/bmbrep.2017.50.8.103), 2017-08-31

Supplementary Figure 1.

A.

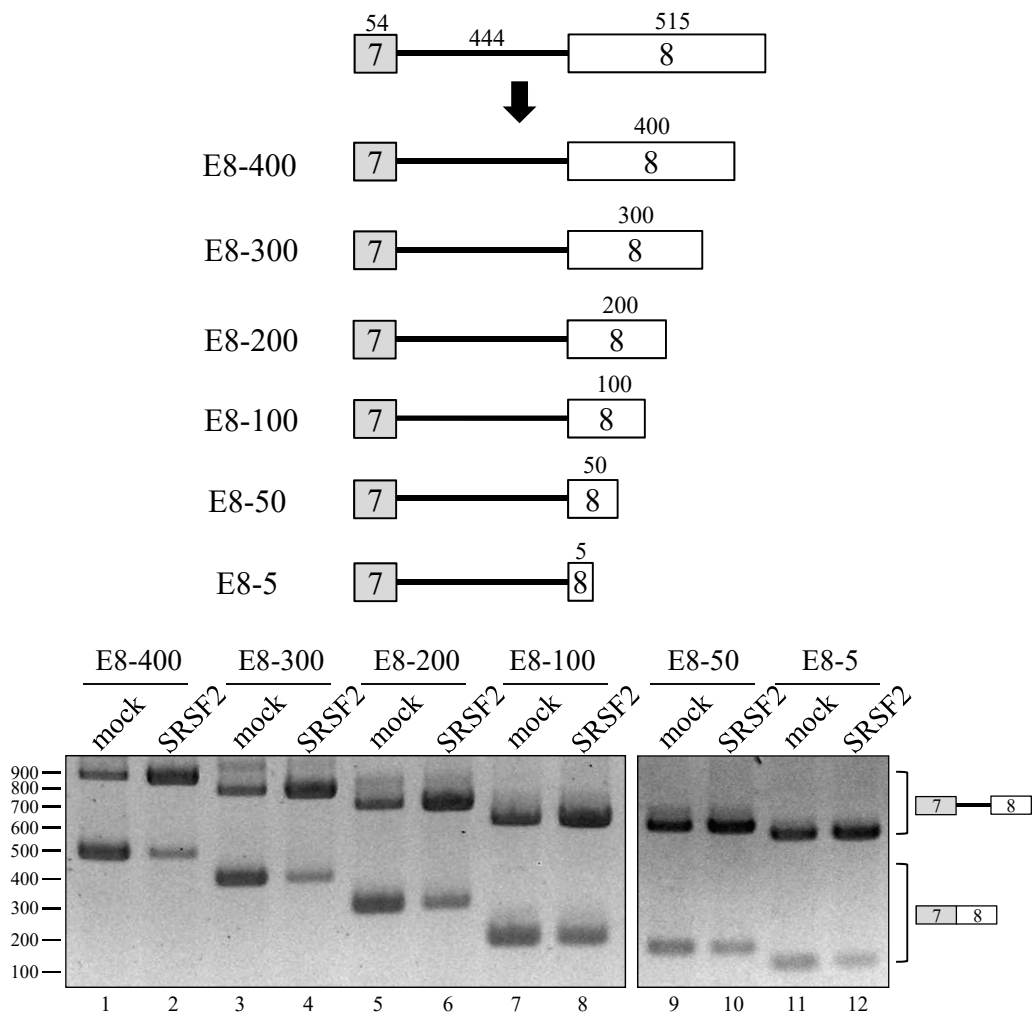

B.

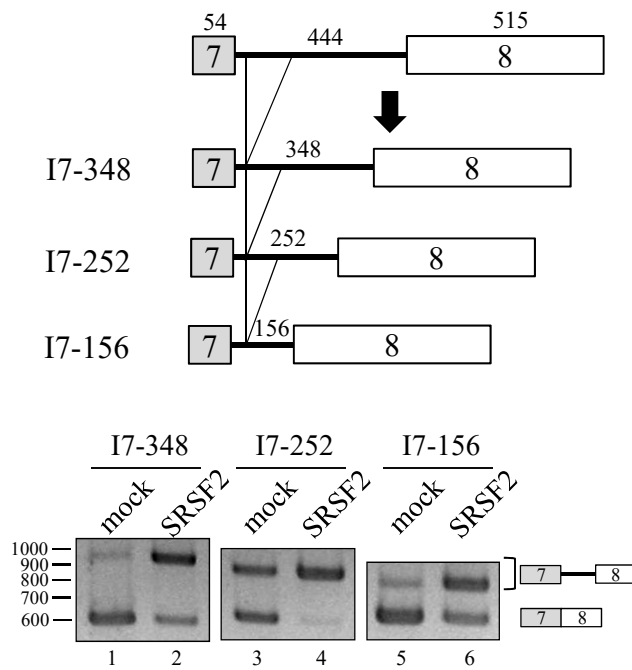

Supplement: bmb-50-423_suppl.pdf [file bmb-50-423_suppl.pdf]
